# Supplementary material for: Preparation of antibacterial nanofibers by electrospinning polyvinyl alcohol containing a luteolin hydroxypropyl-β-cyclodextrin inclusion complex
Source: Royal Society of Chemistry journal article supplement (doi:10.1039/d1nj04922d), 2021-12-27
Supplement: d1nj04922d1.pdf [file d1nj04922d1.pdf]

*New Journal of Chemistry*

## Supporting Information

### **Preparation of Antibacterial Nanofibers by Electrospinning Polyvinyl Alcohol Containing Luteolin Hydroxypropyl- $\beta$ -Cyclodextrin Inclusion Complex**

Xiaoyan Wang,<sup>a</sup> Xiaona Hu,<sup>a</sup> Shiqing Li,<sup>a</sup> Wenhui Shi,<sup>a</sup> Shujing Li,<sup>\*a,b</sup> Yuxi Zhang<sup>\*c</sup>

- a. College of Chemistry and Materials Engineering, Beijing Technology and Business University, Beijing 100048, P. R. China.
- b. Beijing Key Lab of Plant Resource Research and Development, Beijing Technology and Business University, Beijing 100048, P. R. China.
- c. Technical Institute of Physics and Chemistry, Chinese Academy of Science, Beijing 100190, P. R. China.

Tel & Fax: +86-10-6898-5573

\*Corresponding author, E-mail: [lishujing@th.btbu.edu.cn](mailto:lishujing@th.btbu.edu.cn), [zhangyuxi@mail.ipc.ac.cn](mailto:zhangyuxi@mail.ipc.ac.cn)

Table S1 Mechanical properties of PVA-NF and PVA-Lut-IC-NF

|                  | Rm (mPa)   | Maximum deformation (mm) |
|------------------|------------|--------------------------|
| PVA-NF           | 41.82±1.57 | 4.59±3.24                |
| PVA-Lut-IC-NF 1% | 24.18±2.20 | 31.35±7.23               |
| PVA-Lut-IC-NF 2% | 30.2±5.45  | 5.57±3.15                |
| PVA-Lut-IC-NF 3% | 37.67±8.45 | 6.35±1.63                |
